# Supplementary material for: Short Interspersed Nuclear Element (SINE) Sequences in the Genome of the Human Pathogenic Fungus Aspergillus fumigatus Af293
Source: PubMed Central journal article supplement (PMC5063351; doi:10.1371/journal.pone.0163215), 2016-10-13
Supplement: pone.0163215.s013.pdf [file pone.0163215.s013.pdf]

| <b>AfuSINEs</b>  | <b>Primers</b>       | <b>Primer sequences</b>                                    | <b>Product size (bp)</b>  |
|------------------|----------------------|------------------------------------------------------------|---------------------------|
| AfuSINE3-1a      | SINE3F<br>SINE3R1a   | 5'-GACCATAGGGTGTGGAAAAC-3'<br>5'-CCAGCACTCATACGAAAAGCA-3'  | 132                       |
| AfuSINE3-3a      | SINE3F<br>SINE3R3a   | 5'-GACCATAGGGTGTGGAAAAC-3'<br>5'-CCCTATGGTTTAGCGTCTCTCA-3' | 133                       |
| AfuSINE3-3c      | SINE3F<br>SINE3R3c   | 5'-GACCATAGGGTGTGGAAAAC-3'<br>5'-CCCGTATCACCAGCACTCAT-3'   | 144                       |
| AfuSINE3-4a      | SINE3F<br>SINE3R4a   | 5'-GACCATAGGGTGTGGAAAAC-3'<br>5'-CCCTATGGTTCAGTGTCTCTCA-3' | 133                       |
| AfuSINE3-5c      | SINE3F<br>SINE3R5c   | 5'-GACCATAGGGTGTGGAAAAC-3'<br>5'-ATCTGTAAAGTAGCAGGCCTTT-3' | 112                       |
| AfuSINE2-1a      | SINE2F1a<br>SINE2R1a | 5'-TAGTGGTAAGCGCTCCGAG-3'<br>5'-GGTAAATGTTGTGCCAGCGA-3'    | 102                       |
| AfuSINE2-3a      | SINE2F3a<br>SINE2R3a | 5'-CTCTGGGGTTCGGTCGTTAAG-3'<br>5'-GTCGGCTTCAACATACTCACA-3' | 120                       |
| AfuSINE2-4a      | SINE2F4a<br>SINE2R4a | 5'-CCTGGGCAGAAATATGATGGG-3'<br>5'-CCCAAAGGCACCAAATTCCT-3'  | 110                       |
| AfuSINE2-7a      | SINE2F7a<br>SINE2R7a | 5'-GCGGAATGGAAAGTTTCGAA-3'<br>5'-GAATAGAATGCGGCCCACTG-3'   | 139                       |
| AfuSINE2-5d      | SINE2F5d<br>SINE2R5d | 5'-GAGGATGGTCGGAAAATCGC-3'<br>5'-ACCTAATACTCTCAGCTCTCCC-3' | 101                       |
| AfuSINE2-3c      | SINE2F3c<br>SINE2R3c | 5'-GTTGTCTCGGCACAGATGG-3'<br>5'-TCACTGGGTCTTTGGCTAGA-3'    | 134                       |
| AfuSINE2-4c      | SINE2F4c<br>SINE2R4c | 5'-GGGCAGAATCAACAACGTGT-3'<br>5'-TTGGTAAGTGTTCGGTGGC-3'    | 123                       |
| AfuSINE2-7e      | SINE2F7e<br>SINE2R7e | 5'-ACTTATATAGCAGAGTGGTA-3'<br>5'-TCCTATAGCTTCCCTTAAAG-3'   | 123                       |
| $\beta$ -tubulin | TUB-For<br>TUB-Rev   | 5'-CGACGCGAGACTGTGTTAAG-3'<br>5'-TAGTTGGTGCTCAAGGATGG-3'   | 440 (PCR)<br>210 (RT-PCR) |
